# Supplementary material for: Light-Weight Design Method for Force-Performance-Structure of Complex Structural Part Based Co-operative Optimization
Source: Springer Nature journal article supplement (doi:10.1186/s10033-018-0236-3), 2018-05-09
Supplement: MOESM1 [file 15752964]

# Light-weight Design Method for Force- Performance-Structure of Complex Structural Part Based Co-operative Optimization

**Author:** Yali Ma<sup>1</sup>, Jianrong Tan<sup>2</sup>, Delun Wang<sup>1</sup>, Zizhe Liu<sup>1</sup>

1. Dalian University of Technology
2. Zhejiang University

# | Contents

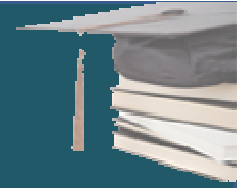

**1**

**Introduction**

**2**

**Optimization Model of Part**

**3**

**Force-performance-structure light-weight design of part**

**4**

**Design Example**

**5**

**Conclusions**

# | Contents

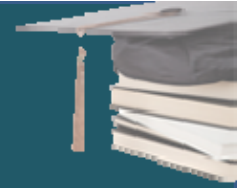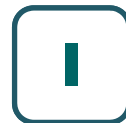

## Introduction

1.1

Background

1.2

Research approach

# 1. Introduction

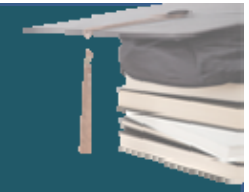

## 1.1 Background

### Complex parts:

Parts have larger size and weight than others in machine.

### Supporting function:

Withstanding the **work loads** and its own **gravity**, and transmitting the loads and forces to the foundation.

### Main feature:

**Heavy**  
**Various work condition**  
**Complex structure**

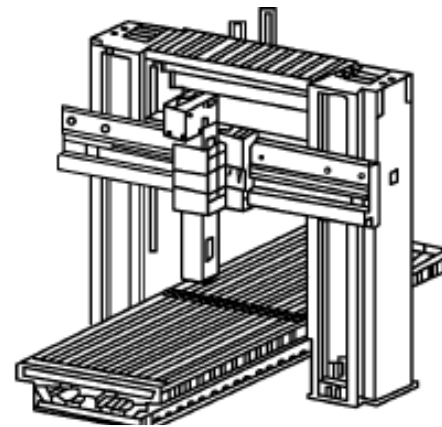

Gantry machining center

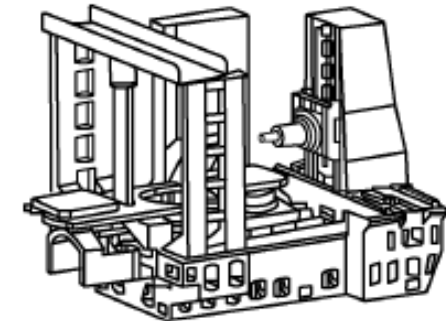

Horizontal machining center

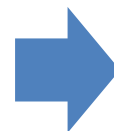

**Difficult to design**

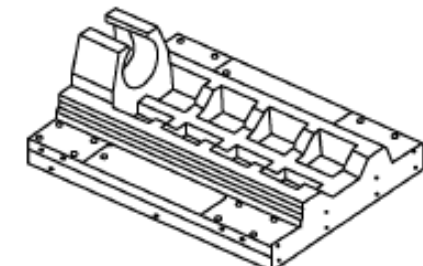

Sliding plate in lathe

# 1. Introduction



## 1.1 Background

### Problems of complex parts design

- The **traditional structural** design adopts **manual** calculations and design by **experience and analogy**.  
The traditional design can be bulky, heavy and costly.
- Lack of proven and reliable **design methodology**.  
Difficult to design the structures which having light weight while meeting the performance requirements.

Explore the **high performance, light weight structure design method** of complex parts.

# 1. Introduction



## 1.2 Research approach

### Force-Performance-Structure design Based on Co-operative Optimization

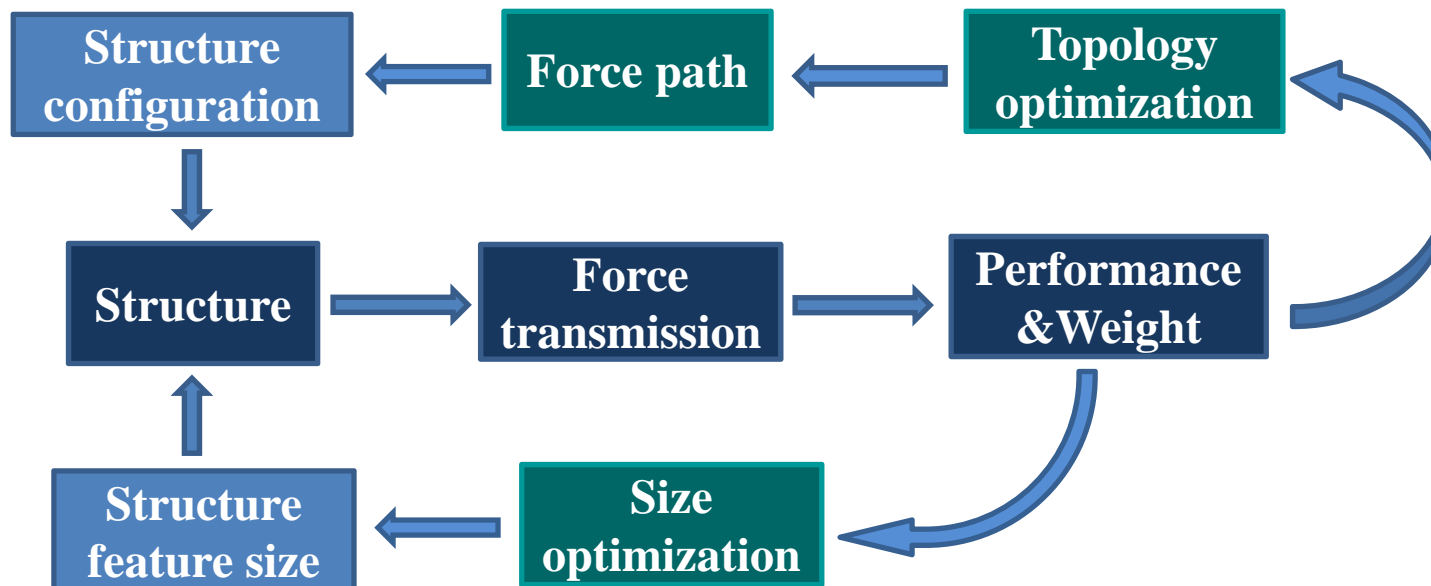

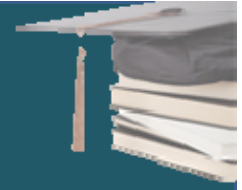

**2**

## **Optimization Model of Part**

**2.1 Mathematical optimization model**

**2.2 Physical optimization model**

# 2. Optimization Model of Part

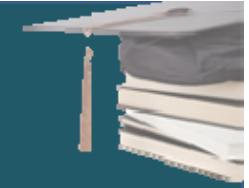

## 2.1 Mathematical optimization model

### *Model of structural configuration*

**Optimization Objective:**

The static and dynamic combined strain energy

**Optimization Constraints:**

The proportion between initial volume and optimized volume

**Optimization variable:**

Element density

### *Topology optimization*

$$\left\{ \begin{array}{l} \min S(\mathbf{x}) = \sum w_i \mathbf{u}_i(\mathbf{x})^T \mathbf{K} \mathbf{u}_i(\mathbf{x}) + NORM \frac{\sum w_j / \lambda_j(\mathbf{x})}{\sum w_j} \\ s.t. \begin{cases} V_i(\mathbf{x}) / V_0 \leq \Delta \\ 0 \leq x_k \leq 1, \quad (k = 1, 2, \dots, N) \end{cases} \end{array} \right.$$

### *Model of structural feature size*

**Optimization Objective:**

Stiffness, strength and mass of parts

**Optimization Constraints:**

Size constraints

**Optimization variable:**

Structural feature size

### *Size optimization*

$$\left\{ \begin{array}{l} \min_x (D_1(\mathbf{X}), \dots, D_i(\mathbf{X}), D_p(\mathbf{X})) \quad i = 1, 2, 3, \dots, p \\ s.t. \quad f_1(\mathbf{X}) \geq f \\ \mathbf{X} = (\mathbf{X}_1, \mathbf{X}_2, \mathbf{X}_i, \dots, \mathbf{X}_n) \quad i = 1, 2, 3, \dots, n \end{array} \right.$$



# 2. Optimization Model of Part



## 2.2 Physical optimization model

*Physical model is a finite element model containing geometric model, design domain, loads (directions and magnitudes) and constraints.*

**Key point: Geometric model & Load and Constraint equivalence**

(1) **Geometric model** can be constructed following **Function rule**, **Geometry rule** and **Size rule**.

It's to describe the **shape and structural characteristics** and show the **spatial connection** between the adjacent parts.

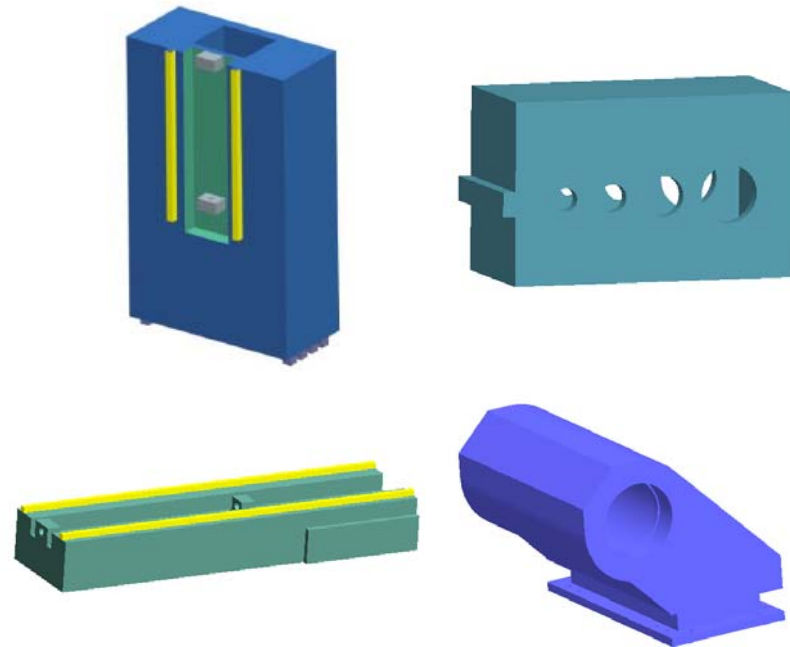

# 2. Optimization Model of Part



## 2.2 Physical optimization model

### (2) Loads and Constraints equivalence

#### Loads equivalence

*Complex part often works in **multi-conditions**, and the working loads change correspondingly.*

The working loads of multi-conditions should be weighted equivalent performed based on **dangerous conditions, typical conditions** and **the working frequency**.

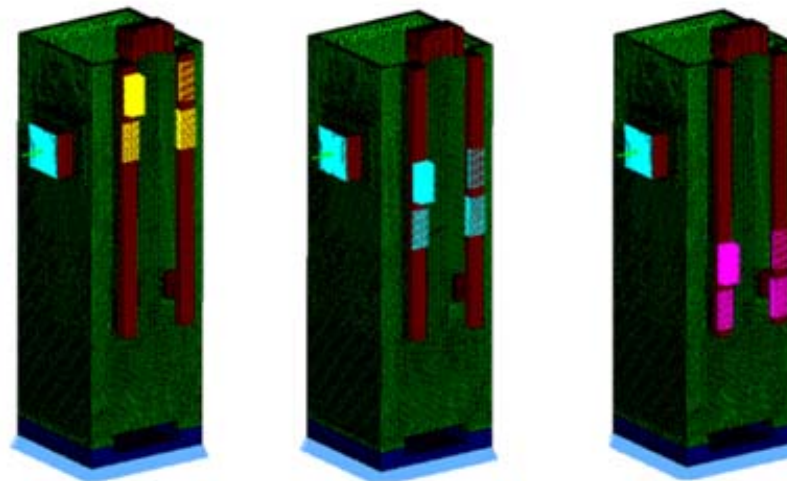

Load equivalence of a column of machining center

# 2. Optimization Model of Part

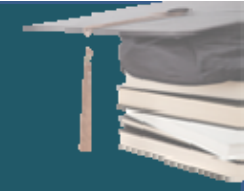

## 2.2 Physical optimization model

### (2) Load and Constraint equivalence

#### Constraints equivalence

*Constraints degree of freedom and the stiffness characteristics determined by the connection type, which is difficult to accurately solve.*

#### Degree of freedom equivalent:

Determine **the number and direction** of the degree of freedom constraints based on the type of connection.

#### Stiffness equivalent:

Equal the stiffness characteristic of **actual joint surface** by using **spring equivalent or contact equivalent** method.

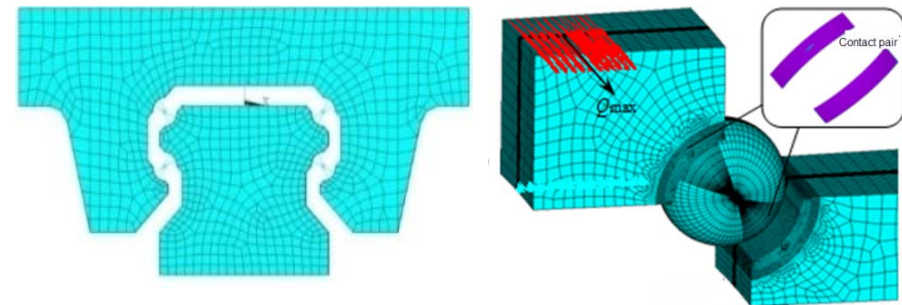

a) Spring equivalent

b) Contact equivalent

Constraint equivalence



**3**

## **Force-performance-structure light-weight design of part**

**3.1 Connection constraint-performance-structure design**

**3.2 Force path-performance-main structure design of part**

**3.3 Force path-performance-sub-structure design of part**

# 3. Force-performance-structure design

## Connection structure:

The structure connected two parts, it determines the **load and the constrain position.**

## Main structure:

The structure of **main body** of part. It directly affects the parts performance.

## Sub-structure:

Local structure **be attached to the main structure** to improve the **local performance of part.**

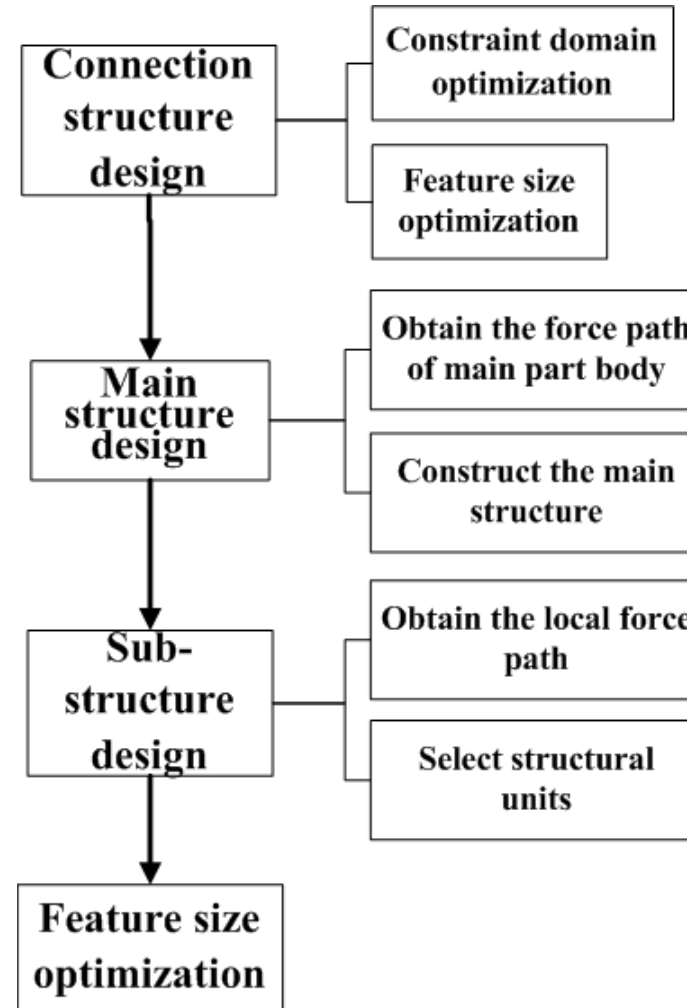

The optimization design process for structure light-weight method

# 3. Force-performance-structure design

## 3.1 Connection constraint-performance-structure design

Connection structure and the main feature size are obtained by using **structural topology optimization** and **size optimization method based on performance**.

### (1) Connection domain optimization design

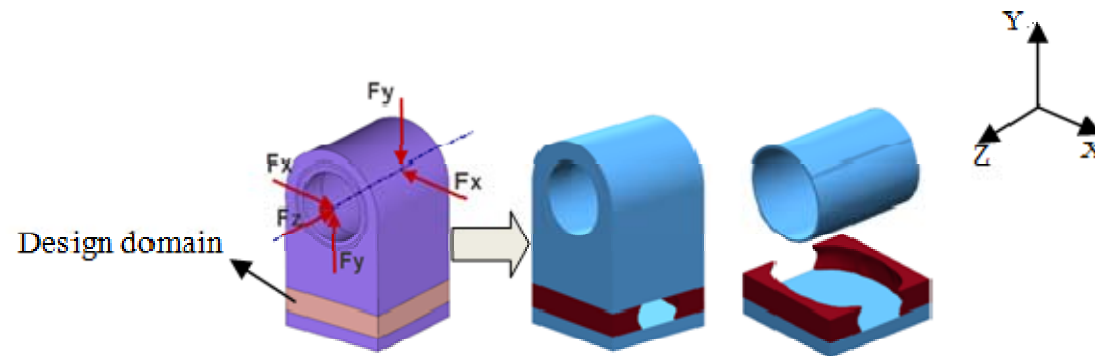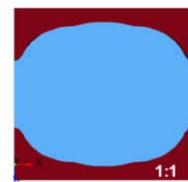

$F_x/F_y=1:1$

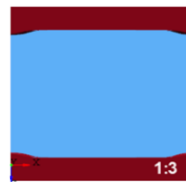

$F_x/F_y=1:3$

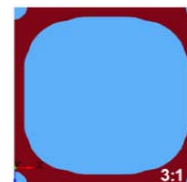

$F_x/F_y=3:1$

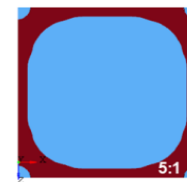

$F_x/F_y=5:1$

The relationship between the load value ratio and the bolt connection domain

# 3. Force-performance-structure design

## 3.1 Connection constraint-performance-structure design

(2) Feature size optimization of connection structure

How to select the main feature size?

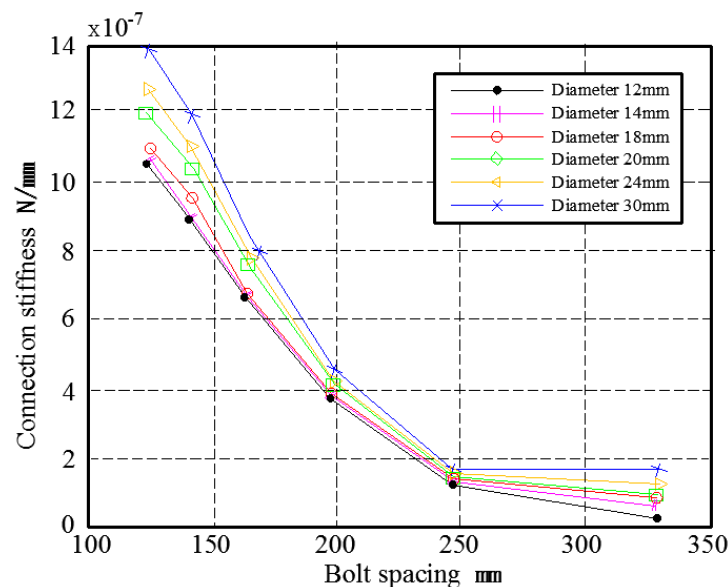

Influence of bolt spacing and bolt diameter on connection stiffness

Obtain the objective function and the constraint function by response surface method

$$D_k(\mathbf{X}) = a_0 + \sum_{i=1}^n b_i X_i + \sum_{i=1}^n c_{ii} X_i^2 + \sum_{ij(i < j)} c_{ij} X_i X_j \quad (k = 1, 2, \dots, p)$$

# 3. Force-performance-structure design

## 3.2 Force path-performance-main structure design of part

Main structure is mapped by the **main force path**. The topology optimization of **multi-conditions** and multi-objectives is carried out to obtain the main force path.

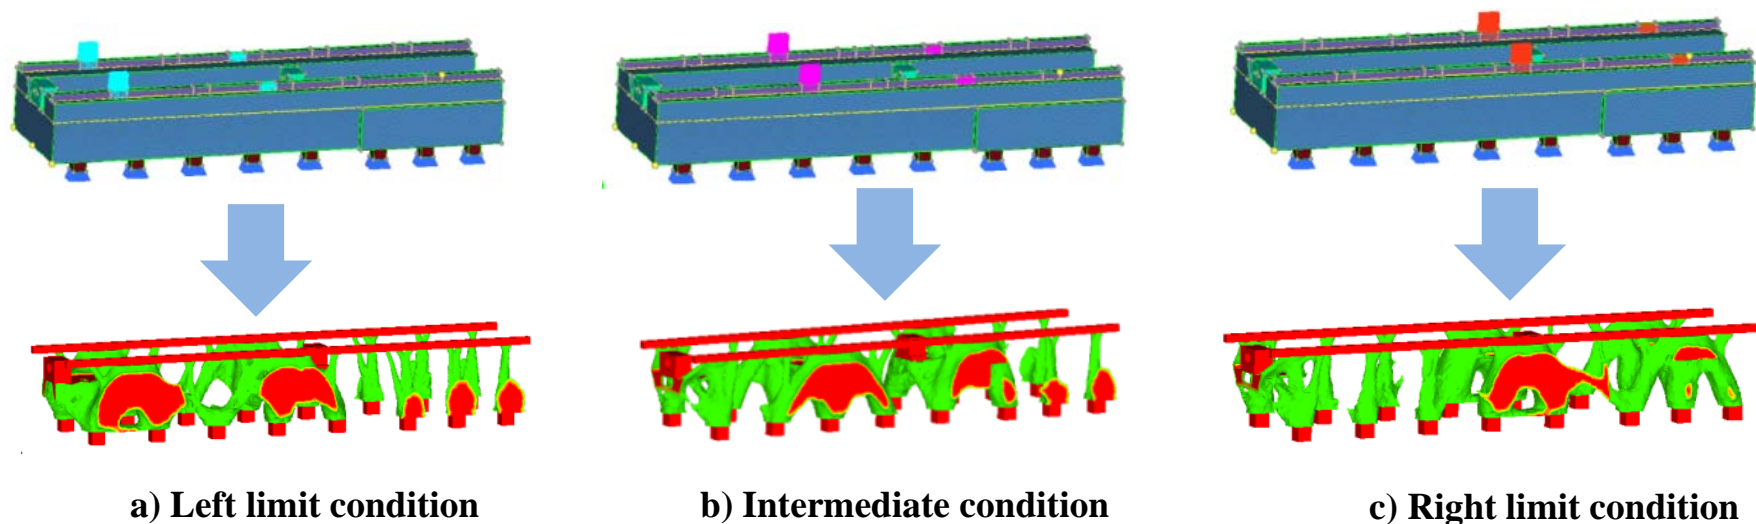

The force paths under different working conditions of gantry-type machining center bed



# 3. Force-performance-structure design

## 3.3 Force path-performance-sub-structure design of part

### Sub-structure:

Some sub-structures will often be attached to the main structure under actual engineering situation to improve the local performance of part.

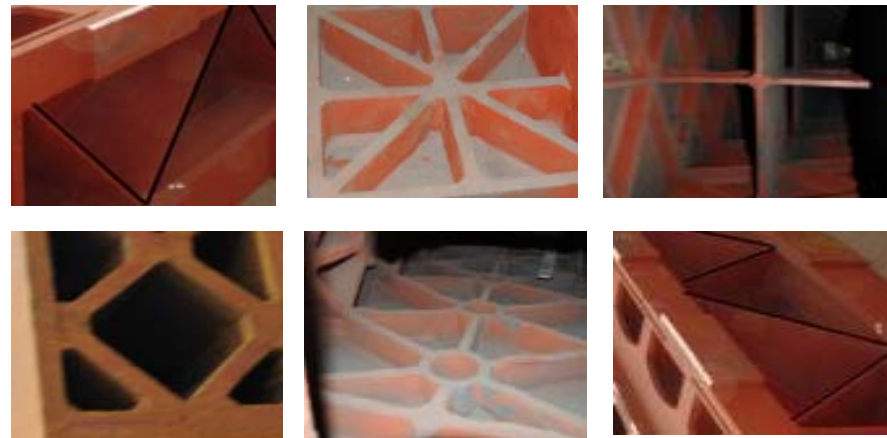

Physical model of sub-structure

Local force path

### Local force path:

Obtained by using the structure topology optimization method and force-structure rule.

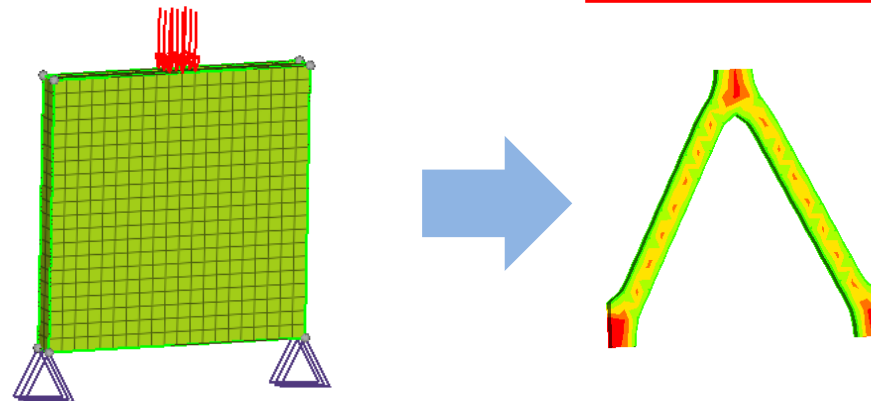

# 3. Force-performance-structure design

## 3.3 Force path-performance-sub-structure design of part

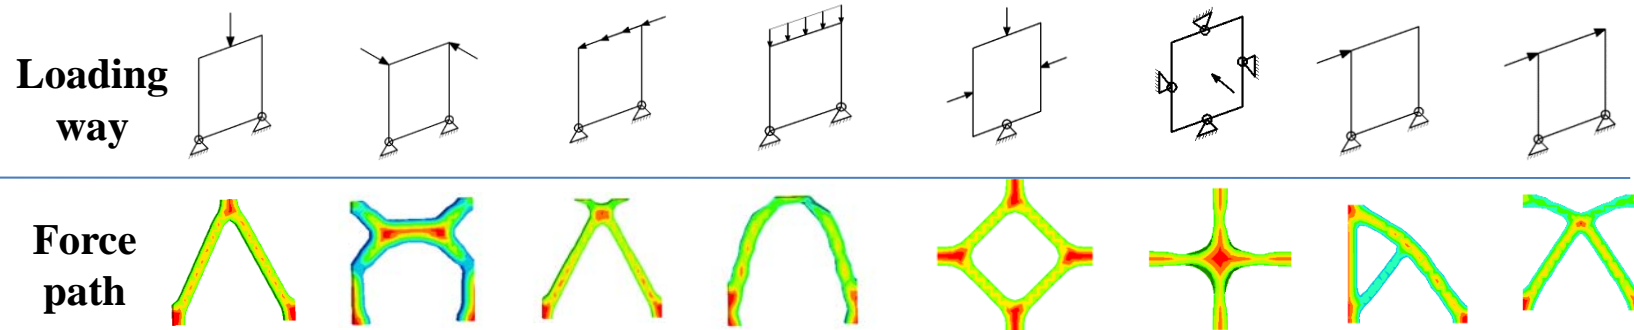

Four kinds of structural units

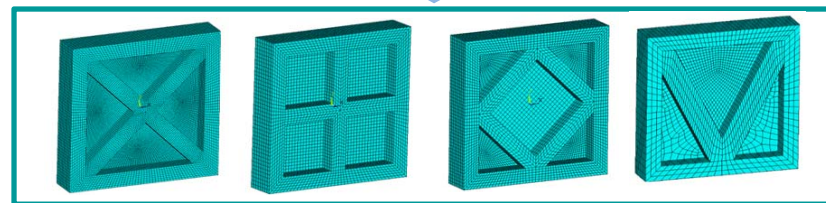

| Static performance of structural unit | Load type | Pull force/ Pressure               | Vertical bending moment            | Horizontal bending moment          | Torque                             |
|---------------------------------------|-----------|------------------------------------|------------------------------------|------------------------------------|------------------------------------|
|                                       | Unit type | Stiffness and mass ratio (1/kg*mm) |
|                                       | X         | 24.73                              | 2.14                               | 29.24                              | 22.01                              |
|                                       | ◇         | 27.15                              | 2.15                               | 29.18                              | 22.43                              |
|                                       | +         | 37.26                              | 2.50                               | 21.45                              | 16.90                              |
|                                       | V         | 30.84                              | 2.45                               | 25.41                              | 21.38                              |



## 4

### Design example

4.1 Connection constraints design

4.2 Main structure design

4.3 Sub-structure design

# 4. Design example



## 4.1 Connection structure design

The part **connection constraints**, the **main** and **sub-structure configuration** and the **feature size** optimization design are carried out with a gantry machining center bed.

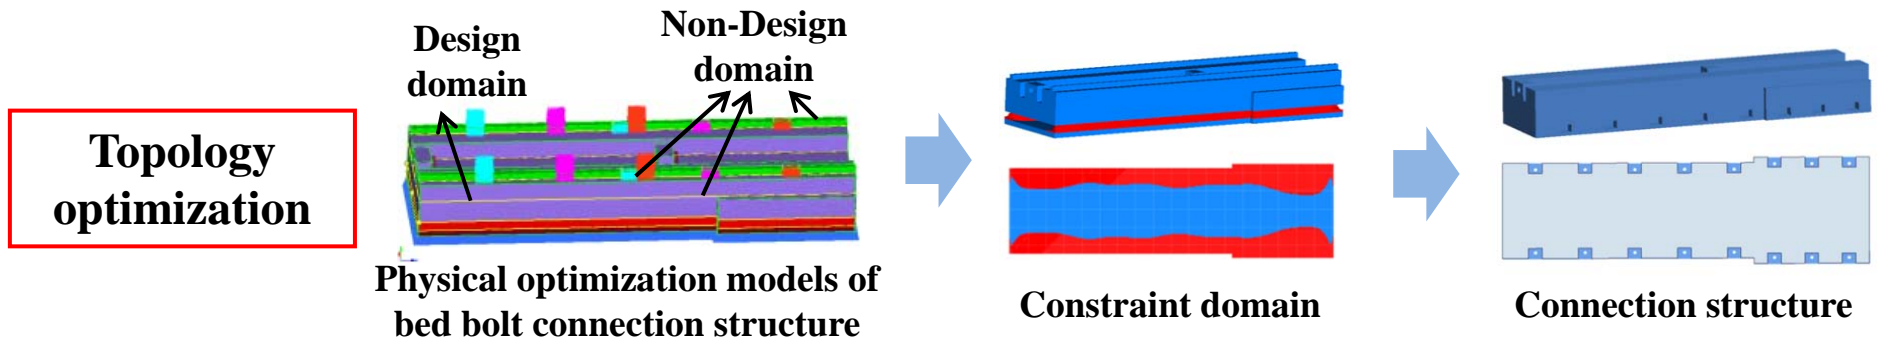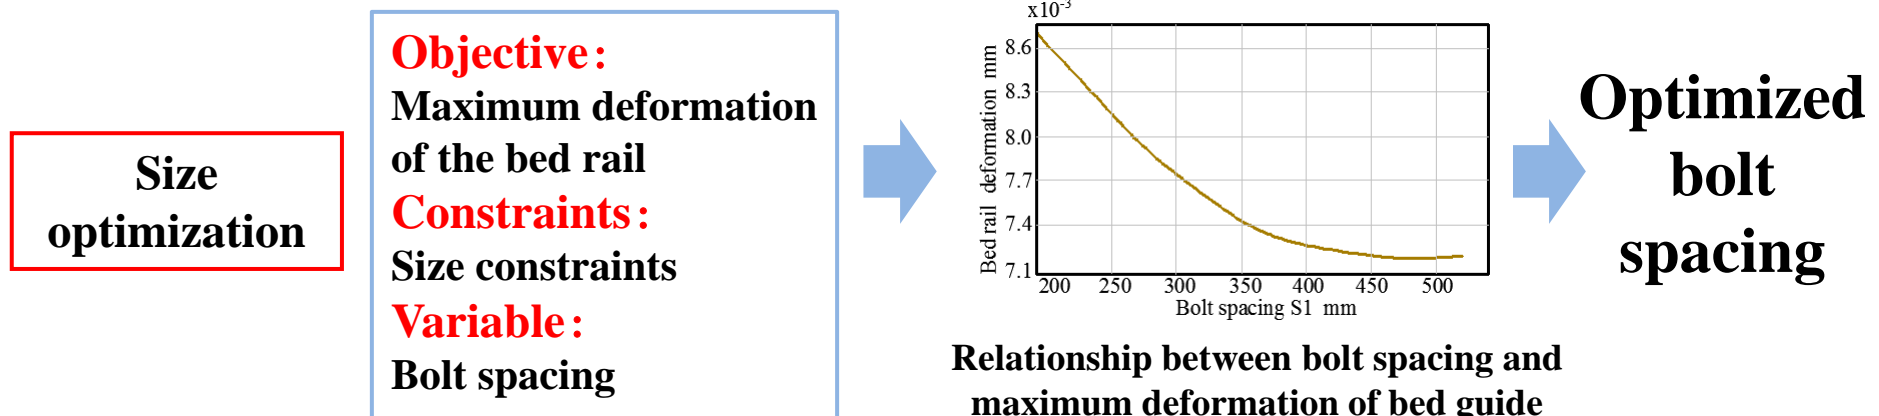

# 4. Design example



## 4.2 Main structure design

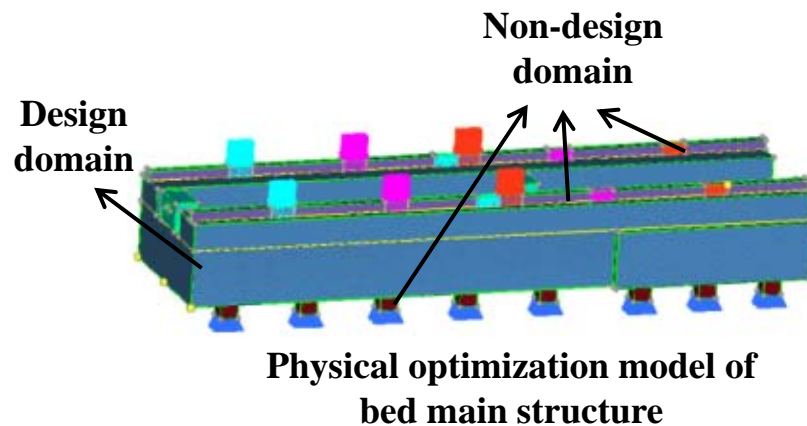

The main force path obtained by topology needs to further rectify following the **Configuration symmetry**, **Configuration path closure**, and **Configuration path consistent rules** to eventually realize the design from the force transmission path to the structure.

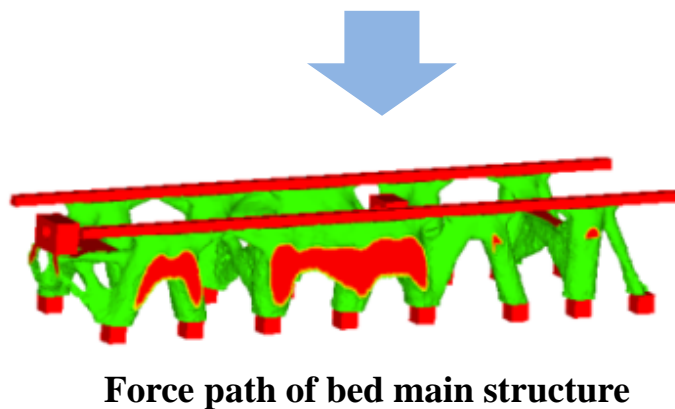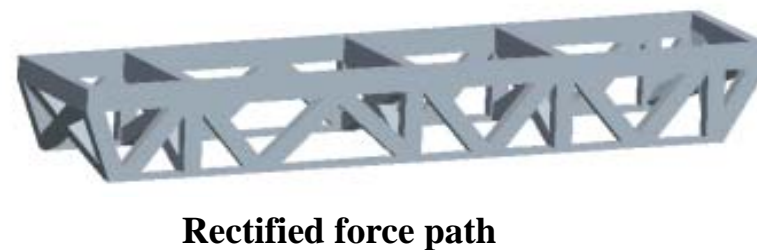

# 4. Design example



## 4.3 Sub-structure design

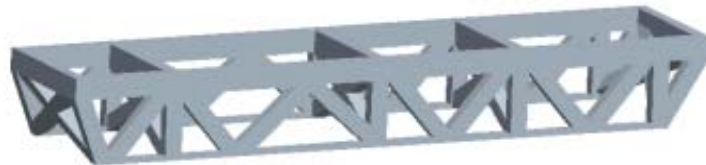

As the upper wall of the bed is mainly subjected to bending moments, the "X" structural unit is added to the upper wall of the bed.

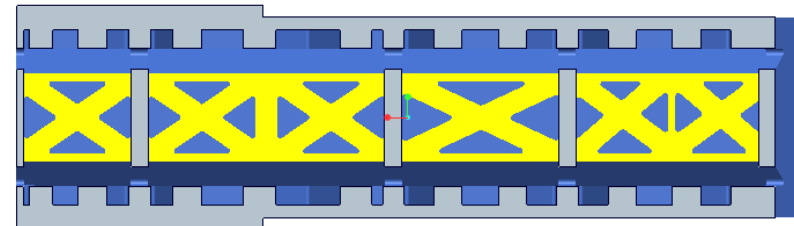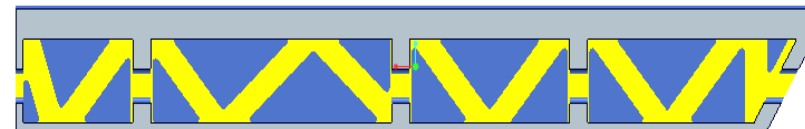

Feature size optimization

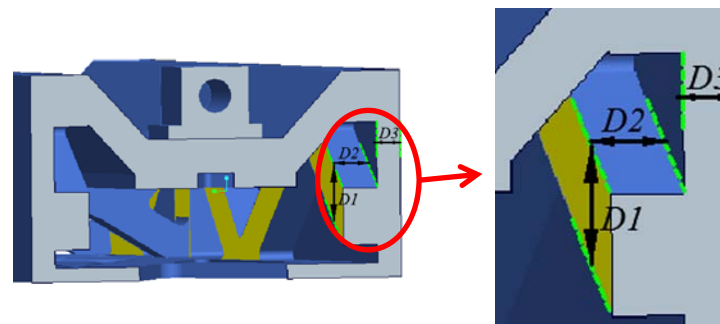

### Objective:

Minimum bed mass and rail deformation

### Constraints:

Size constraints

### Variable:

Ribbed slab width  $D1$

Ribbed slab height  $D2$

Panels thickness  $D3$

# 4. Design example



## 4.3 Sub-structure design

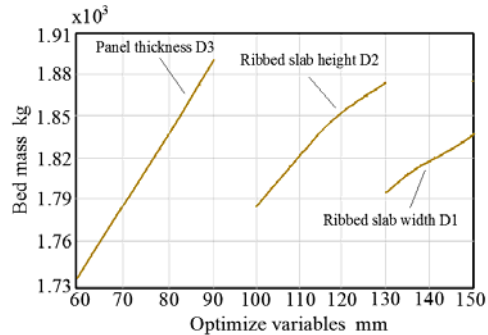

The relationship between the variable and bed mass

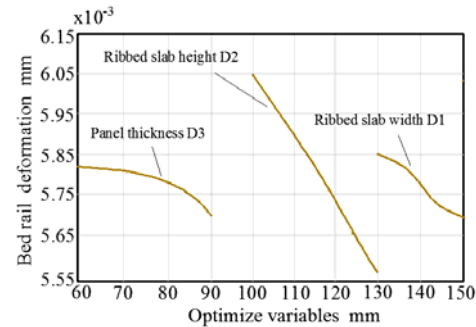

The relationship between the variable and bed rail deformation

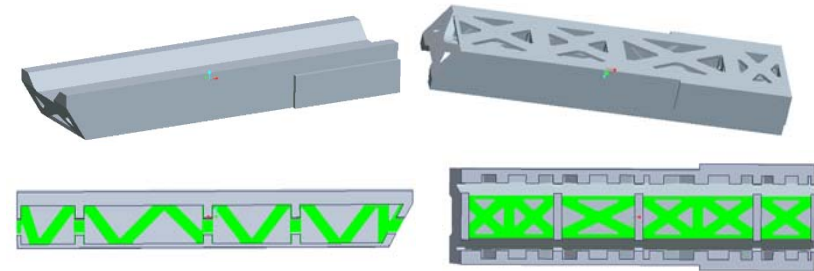

The new bed structure

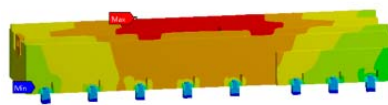

Deformation cloud of original bed

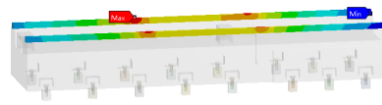

Deformation cloud of optimized bed

### Comparison of Bed Performance

| Mass                   | Original bed | Optimized bed | Optimization percentage |
|------------------------|--------------|---------------|-------------------------|
| Mass(t)                | 18.5t        | 17.1t         | 8%                      |
| Total deformation (mm) | 0.0081       | 0.0080        | 1%                      |
| Rail deformation (mm)  | 0.0062       | 0.0059        | 5%                      |

# |5. Conclusions

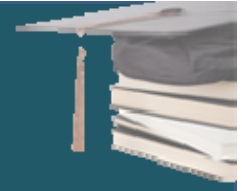

- (1) The proposed light-weight design can effectively obtain **structure configuration** and **main feature size** under multi-condition. The method can be performed through **topology and size optimization** of connection structure, main structure, and sub-structure design.
- (2) The load and constraint domain of part (joint surface) directly **affect the optimization results of structure**. And the load ratio of different directions affects the optimization results of constraint domain distribution.
- (3) The optimized bed **is lighter 8%** than original bed, and the rail deformation is **reduced by 5%**. The design method proposed is effective and reasonable.



|END



*Thanks!*
